# Supplementary material for: Evaluation of cranial tibial translation in dogs: Diagnostic accuracy of radiographic method using a simple device
Source: PubMed Central journal article supplement (PMC7012417; doi:10.1371/journal.pone.0228621), 2020-02-11
Supplement: pone.0228621.s003.pdf [file pone.0228621.s003.pdf]

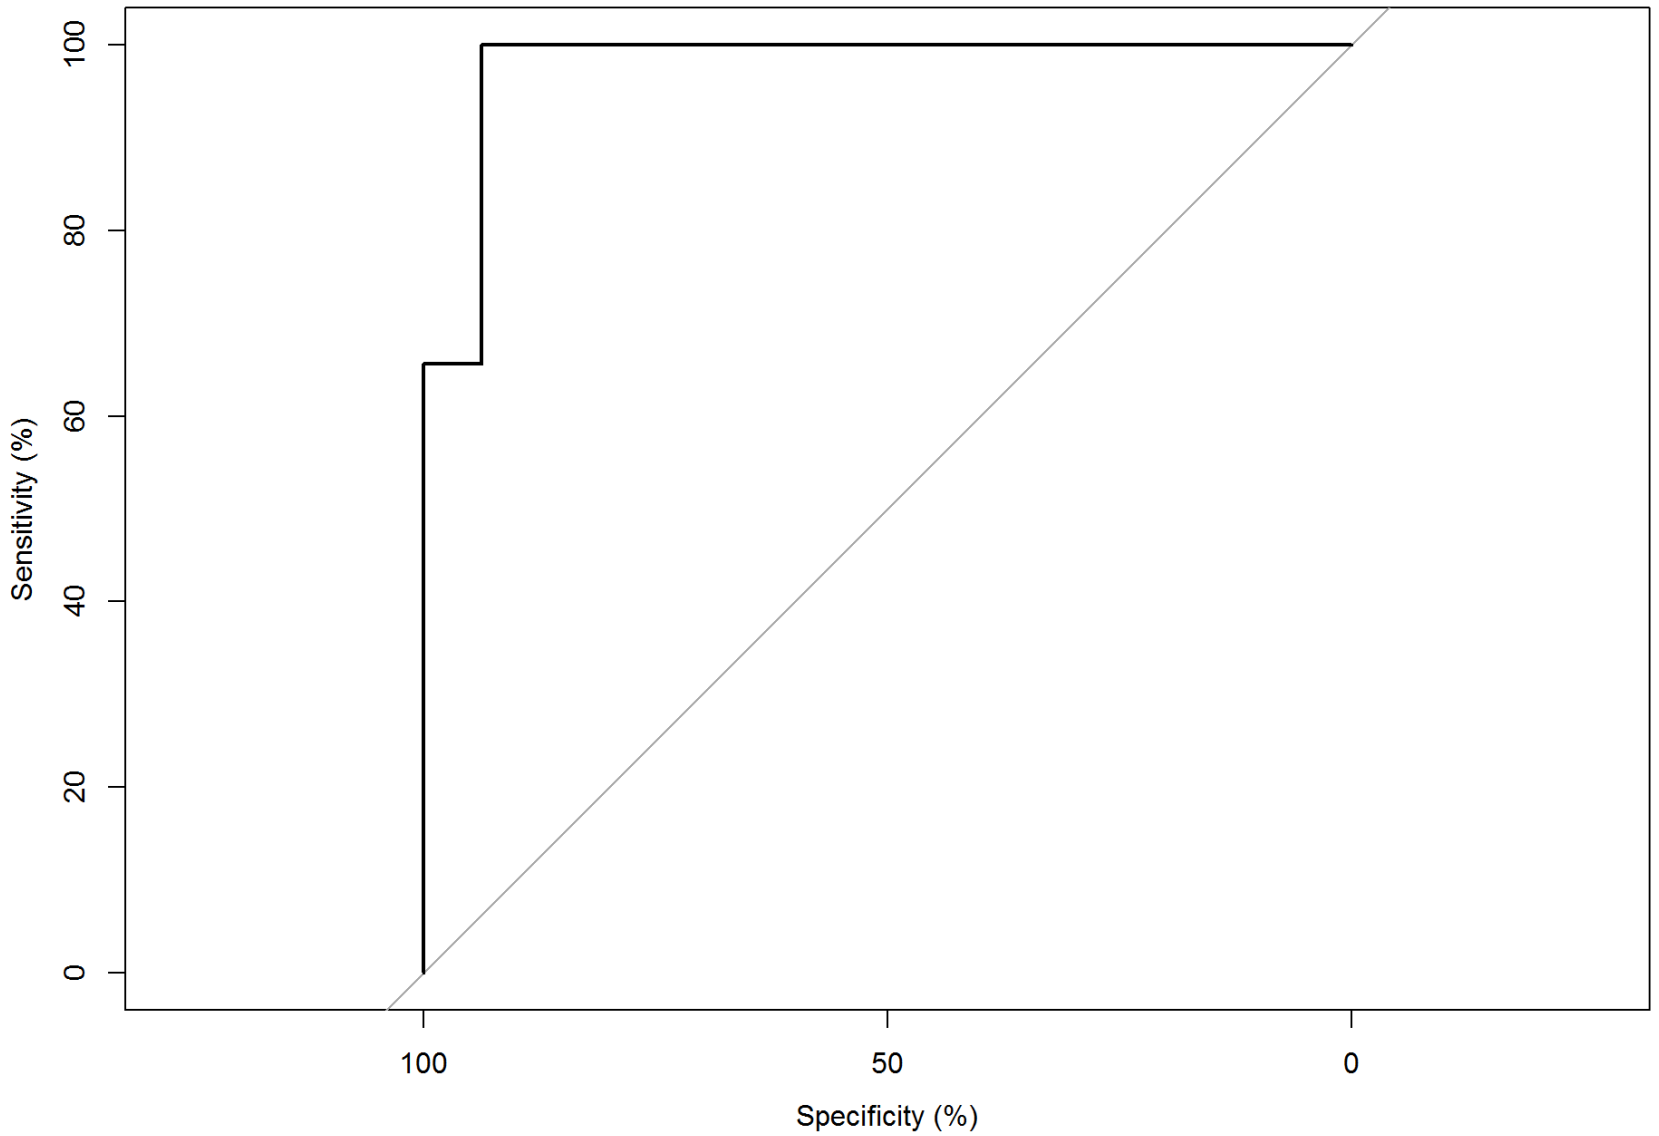

**S2 Figure.** ROC curve of normalized tibial translation ( $\Delta_N$ ) considering Group PA (pathological stifles) and Group CO (contralateral stifles).
